# Supplementary material for: Amide proton transfer-weighted CEST MRI for radiotherapy target delineation of glioblastoma: a prospective pilot study
Source: PubMed Central journal article supplement (PMC11525355; doi:10.1186/s41747-024-00523-4), 2024-10-30
Supplement: 41747_2024_523_MOESM1_ESM.pdf [file 41747_2024_523_MOESM1_ESM.pdf]

# Amide proton transfer-weighted CEST MRI for radiotherapy target delineation of glioblastoma: a prospective pilot study

## ELECTRONIC SUPPLEMENTARY MATERIAL

### SUPPLEMENTARY TABLE 1

Target volumes of each individual patient [mL]

| Patient | GTV   | GTV <sub>MTRasym</sub> | GTV <sub>LD</sub> | CTV    | BTV <sub>MTRasym</sub> | BTV <sub>LD</sub> |
|---------|-------|------------------------|-------------------|--------|------------------------|-------------------|
| #1      | 33.65 | 34.18                  | 34.35             | 145.02 | 5.33                   | 7.11              |
| #2      | 68.96 | 124.98                 | 105.08            | 248.58 | 99.95                  | 77.31             |
| #3      | 46.31 | 52.28                  | 50.51             | 134.00 | 26.45                  | 12.46             |
| #4      | 64.77 | 70.76                  | 70.66             | 279.92 | 38.01                  | 32.69             |
| #5      | 6.93  | 7.54                   | 6.93              | 76.42  | 2.60                   | 0.00              |
| #6      | 62.19 | 62.70                  | 62.25             | 171.10 | 13.84                  | 5.77              |
| #7      | 30.48 | 32.82                  | 30.48             | 104.88 | 6.04                   | 0.00              |
| #8      | 70.74 | 101.11                 | 110.91            | 376.13 | 71.35                  | 83.92             |
| #9      | 83.59 | 93.47                  | 83.91             | 334.84 | 26.21                  | 4.30              |
